# Supplementary material for: Comparison of different sample preparation methods for platinum determination in cultured cells by graphite furnace atomic absorption spectrometry
Source: PeerJ. 2017 Jan 18;5:e2873. doi: 10.7717/peerj.2873 (PMC5248575; doi:10.7717/peerj.2873)
Supplement: Figure S2 [file peerj-05-2873-s002.xlsx]

## Sheet: Sheet1
	Pt content (ng/aliquot)
	0.2% HNO3			0.2% Triton X-100			Concentrated HNO3 60℃ 20min			Concentrated HNO3 80℃ 1h			RIPA+Concentrated HNO3 60℃ 2h
A2780	138.7	142	135.4	176.2	139.3	213.1	88.7	90.3	87.1	94.4	92.3	96.5	67.2	66.9	67.5
Hela	141.7	148.4	135	182.1	126.6	237.6	52.5	50.5	54.5	63.4	62.2	64.6	49.7	44.9	54.5
HepG2	104.2	108.1	100.3	105.6	81.6	129.6	38	37.5	38.5	28	27.1	28.9	40.2	54.6	25.8
