# Supplementary material for: Comparison of different sample preparation methods for platinum determination in cultured cells by graphite furnace atomic absorption spectrometry
Source: PeerJ. 2017 Jan 18;5:e2873. doi: 10.7717/peerj.2873 (PMC5248575; doi:10.7717/peerj.2873)
Supplement: Figure S3 [file peerj-05-2873-s003.xlsx]

## Sheet: Sheet1
Ntric acid (%)	0.05	0.1	0.2	0.4	0.6	0.8	1	2	3	4	5
Pt concentration (Mean, ug/L)	30.24	21.8	32.08	21.6	19	34.4	38.72	28.11	57.44	14.18	47.44
SD	14.9	72.4	0.8	18.8	19.1	26	17.5	9.7	41.5	33.2	59.9
