# Supplementary material for: Comparison of different sample preparation methods for platinum determination in cultured cells by graphite furnace atomic absorption spectrometry
Source: PeerJ. 2017 Jan 18;5:e2873. doi: 10.7717/peerj.2873 (PMC5248575; doi:10.7717/peerj.2873)
Supplement: Figure S4 — A2780 and CAOV3 cells were treated with 20 uM cisplatin for 12, 24, 36, 48, and 72 hours and the intracellular platinum contents were analyzed. The cisplatin-resistant subline A2780/CDDP was incubated with 20 uM cisplatin for 24 hours. [file peerj-05-2873-s004.xlsx]

## Sheet: Sheet1
	Protein	Pt	Pt/Protein				Protein	Pt	Pt/Protein
	mg/aliquot	ng/aliquot	ng/mg protein				mg/aliquot	ng/aliquot	ng/mg protein
A2780-20uM-12h-1	0.595968	44.14	74.0644			CAOV3-20uM-12h-1	0.270588	2.12	7.83478
A2780-20uM-24h-1	0.603226	60.64	100.526			CAOV3-20uM-24h-1	0.785294	10.62	13.5236
A2780-20uM-48h-1	0.748387	67.08	89.6328			CAOV3-20uM-48h-1	0.784314	24.12	30.753
A2780-20uM-72h-1	0.683065	52.08	76.2446			CAOV3-20uM-72h-1	0.24902	5.47	21.9661
A2780-20uM-36h-1	1.45806	48.28	33.1124			CAOV3-20uM-36h-1	0.594118	6.92	11.6475
A2780-20uM-12h-2	0.162097	10.215	63.0179			CAOV3-20uM-12h-2	0.69128	3.46	5.00521
A2780-20uM-24h-2	0.595968	55.175	92.5805			CAOV3-20uM-24h-2	1.13594	21.24	18.6982
A2780-20uM-48h-2	0.191129	14.3	74.8186			CAOV3-20uM-48h-2	1.11339	42.21	37.9113
A2780-20uM-72h-2	0.353226	15.5	43.8813			CAOV3-20uM-72h-2	0.189059	6.36	33.6403
A2780-20uM-36h-2	0.950806	26.2	27.5556			CAOV3-20uM-36h-2	0.831356	13.675	16.449
A2780-20uM-12h-3	0.327843	7.2	21.9617			CAOV3-20uM-12h-3	0.276613	3.65	13.1953
A2780-20uM-24h-3	0.488235	34.8	71.2771			CAOV3-20uM-24h-3	0.348387	11.48	32.9519
A2780-20uM-48h-3	0.351324	8.72	24.8204			CAOV3-20uM-48h-3	0.573387	30.77	53.6636
A2780-20uM-72h-3	0.646846	13.05	20.1748			CAOV3-20uM-72h-3	0.441475	13.02	29.4921
A2780-20uM-36h-3	0.695	12.78	18.3885			CAOV3-20uM-36h-3	0.487097	0.515	1.05728
ACP-20uM-24h-1	0.258824	8.72	33.6909
ACP-20uM-24h-2	0.435294	11.6	26.6486
ACP-20uM-24h-3	0.379608	5.4	14.2252
